# Supplementary material for: Antitumor efficacy of BAFF-R targeting CAR T cells manufactured under clinic-ready conditions
Source: Springer Nature journal article supplement (doi:10.1007/s00262-020-02614-8), 2020-05-25
Supplement: MOESM1 [file 18010626]

## Supplementary Figure Legends

**Supplementary Figure S1. BAFF-R CAR T cell expansion.** Growth curve plots the expansion of BAFF-R CAR T cells produced by our **a** Research Grade and **b** cGMP protocols. **a** T<sub>N</sub> cells were transfected with clinical or prototype vectors and stimulated with varying stimulation beads:cell ratios. Expansion was observed one week post CAR-T cell enrichment. **b** T<sub>N/MEM</sub> cells were transfected with clinical vectors at MOI= 0.5, 1, or 2. CAR T cells were cultured and monitored for 14 days. Non-transduced T cells were used as a control.

**Supplementary Figure S2. cGMP BAFF-R CAR T cell degranulation.** FACS plots of BAFF-R CAR T cell from Supplemental Figure 1 show **a** gating strategy and **b** functional potency as measured by a CD107a following a degranulation assay. CD4 or CD8 BAFF-R CAR T cells were coincubated with either BAFF-R-positive or –negative Nalm-6 B-ALL line.

**Supplementary Figure S3. cGMP BAFF-R CAR T cell IFN- $\gamma$  release assay.** Graph shows ELISA measurements of IFN- $\gamma$  released by BAFF-R CAR T cell from Supplemental Figure 1. cGMP BAFF-R CAR T cells were coincubated with either BAFF-R-positive or –negative Nalm-6 B-ALL line. IFN- $\gamma$  was measured from the cell supernatant.

**Supplementary Table 1. Vector and CAR T cell Nomenclature**

|                   | <i>Nomenclature</i> | <i>Description</i>                                                                            |
|-------------------|---------------------|-----------------------------------------------------------------------------------------------|
| Lentiviral vector | prototype vector    | BAFF-R:4-1BB: $\zeta$ /GFP in a pLenti7.3/v5-DEST lentiviral vector backbone                  |
|                   | clinical vector     | BAFF-R:4-1BB: $\zeta$ /EGFRt in a second-generation pHIV7 clinical lentiviral vector backbone |
| CAR-T             | Prototype CAR-T     | Prototype vector used in research-grade production                                            |
|                   | Clinic-ready CAR-T  | Clinical vector used in research-grade production                                             |
|                   | cGMP CAR-T          | Clinical vector used in GMP production                                                        |
