# Supplementary material for: Antitumor efficacy of BAFF-R targeting CAR T cells manufactured under clinic-ready conditions
Source: Springer Nature journal article supplement (doi:10.1007/s00262-020-02614-8), 2020-05-25

# Supplementary Figure S1

## a Research Grade BAFF-R CAR T-cell Expansion

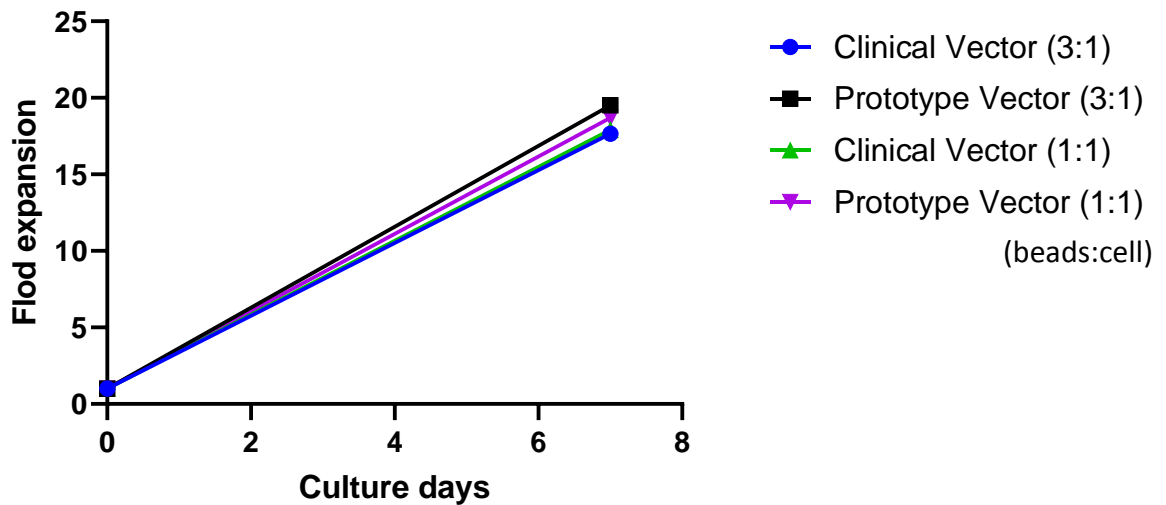

## b cGMP Grade BAFF-R CAR T-cell Expansion

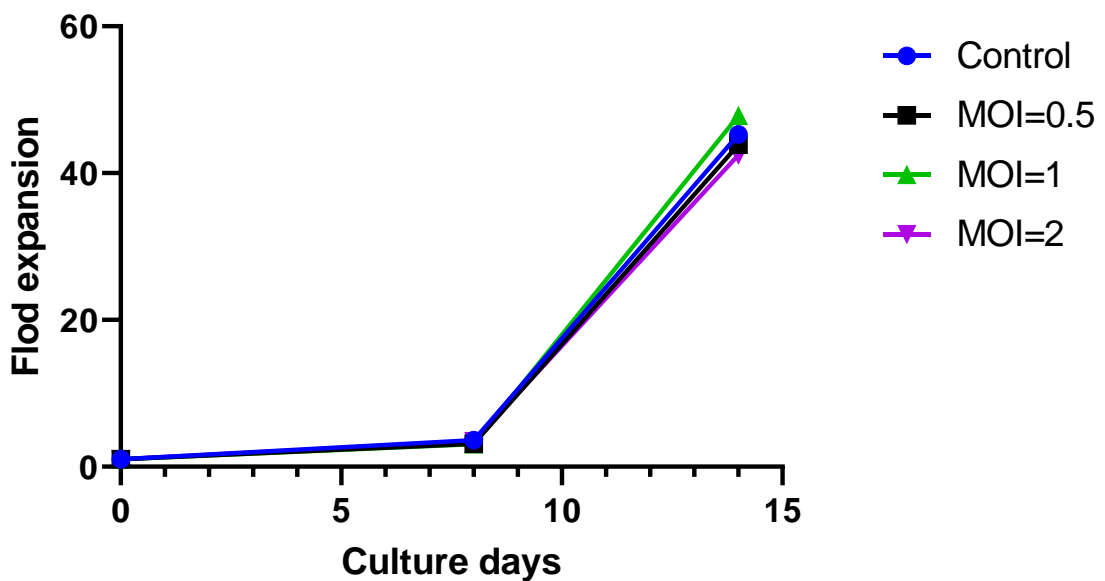

# Supplementary Figure S2

## Gating Strategy

a

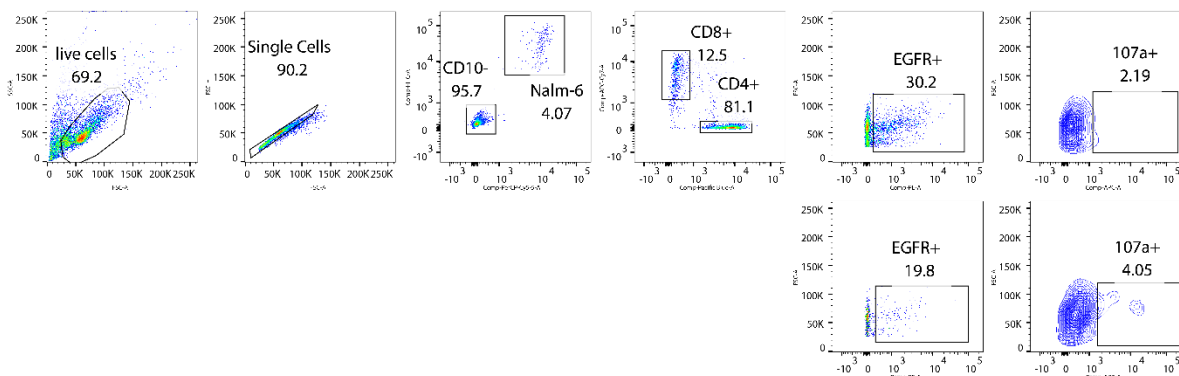

b

### BAFF-R CD4 CART cells

### BAFF-R CD8 CART cells

Non-CAR

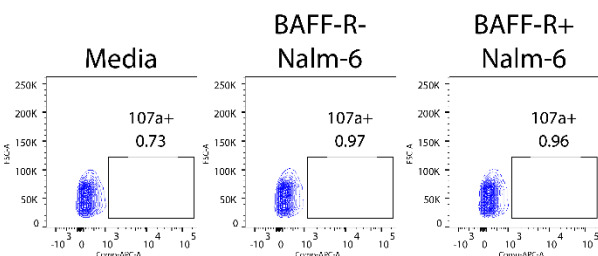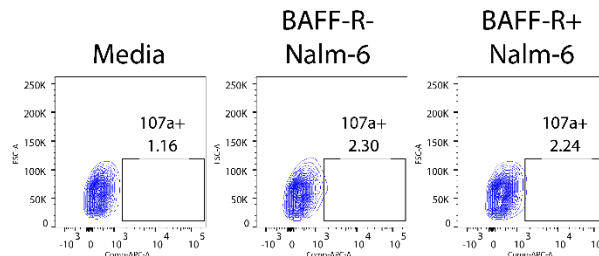

MOI=0.5

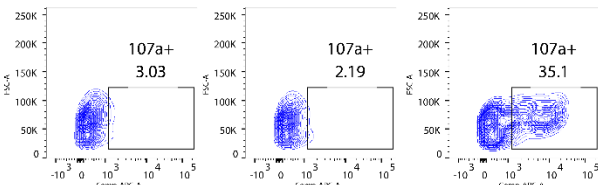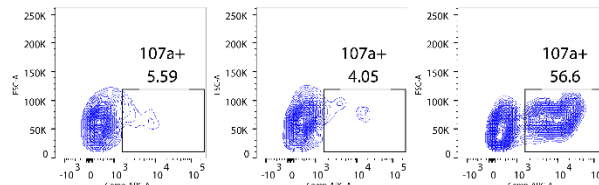

MOI=1

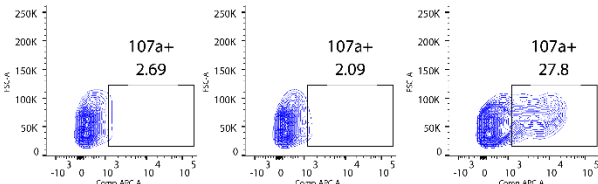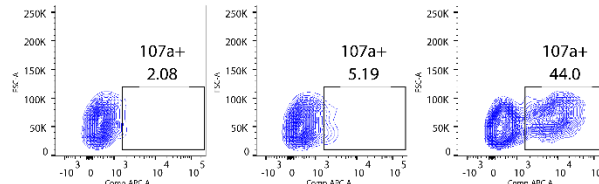

MOI=2

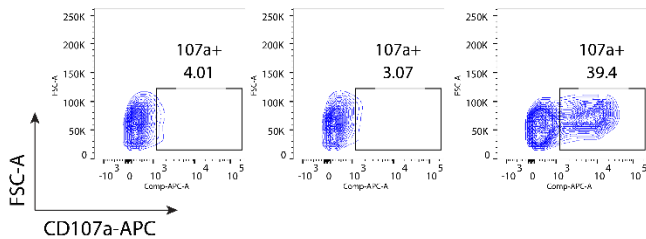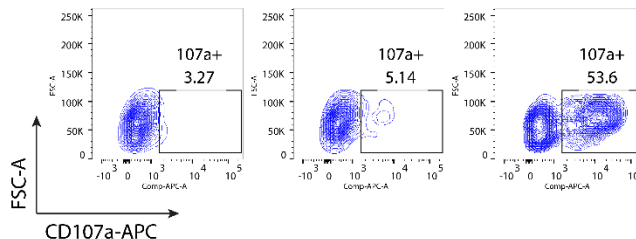

FSC-A  
CD107a-APC

FSC-A  
CD107a-APC

## Supplementary Figure S3

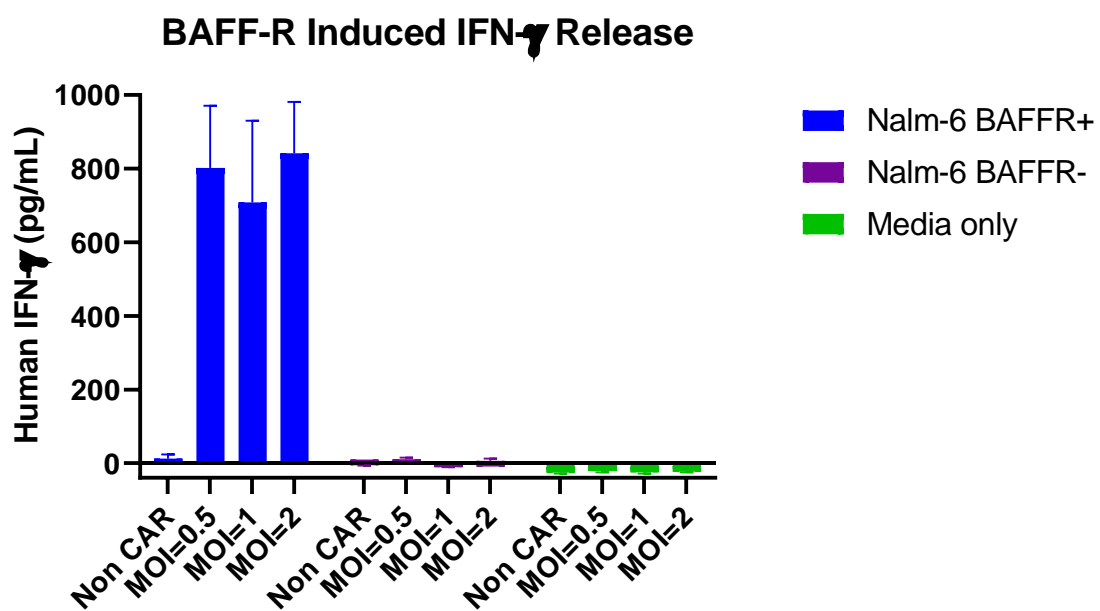

Supplement: MOESM2 [file 18010626]
